# Supplementary material for: Risk assessment of FLT3 and PAX5 variants in B-acute lymphoblastic leukemia: a case–control study in a Pakistani cohort
Source: PeerJ. 2019 Sep 10;7:e7195. doi: 10.7717/peerj.7195 (PMC6743442; doi:10.7717/peerj.7195)
Supplement: Data S1 — Raw data showing genotype of 3 SNPs and environmental factors associated with the disease. Sheet 1 displays patients data and sheet 2 display controls data. [file peerj-07-7195-s001.xlsx]

## Sheet: PATIENTS
FLT3TAQ	PAX5	FLT3	POSITIVE FAMILY HISTORY	SMOKING	COUSIN MARRIAGE	EXPOSED WITH RADIATION	hepatomegaly	nephropathy	Age	Gender
GA	AA	GG	N	N	Y	N	N	N	14	f
GA	GA	AG	N	Y	N	N	N	N	5	m
GG	AA	AA	Y	N	N	N	N	N	7	m
GG	GA	GG	N	N	Y	N	N	N	6	m
GG	AA	GG	N	Y	Y	N	Y	Y	2.6	f
GG	GG	GG	N	Y	Y	N	N	N	4	f
GG	AA	AA	N	N	N	N	N	N	2	m
GA	AA	GG	N	N	N	N	N	N	2	m
GG	GG	AA	N	Y	N	N	N	N	10	m
GG	GA	AG	Y	N	Y	N	N	N	11	f
GG	GG	AA	N	N	N	N	N	N	8	f
GG	AA	AG	N	Y	N	N	N	N	3	f
GA	GA	GG	N	Y	N	N	N	N	14	f
AA	AA	AA	Y	N	Y	N	N	N	15	f
GG	GG	AG	N	Y	Y	N	N	N	2	m
GG	GA	AA	N	N	Y	N	N	N	14	m
GG	GG	AG	N	N	N	N	Y	N	6	m
GG	AA	AA	N	N	Y	N	N	N	8	m
GG	GA	GG	N	Y	N	N	N	N	3	m
GG	GA	AA	Y	N	N	N	N	Y	10	m
GG	GG	AG	N	N	N	N	N	N	12	f
GA	AA	AA	N	Y	Y	N	N	N	7	f
GG	GA	AA	N	N	N	N	N	N	3	f
GG	AA	GG	N	Y	Y	N	N	N	7.5	m
GG	GG	AA	N	N	N	N	Y	N	4	m
GG	AA	AA	Y	N	Y	N	N	N	2.5	m
GG	GG	AA	N	Y	Y	N	N	N	5	m
GA	AA	AA	N	Y	N	N	N	N	4	f
AA	GA	AA	N	Y	N	N	N	N	8	f
GG	GA	AG	N	N	N	N	N	N	7	f
GG	AA	AA	N	N	Y	N	Y	N	5	f
GG	GA	AA	N	N	Y	N	Y	N	13	f
GG	GA	AG	N	Y	N	N	N	N	5	f
GG	AA	AA	Y	N	N	N	N	N	10	f
GG	GG	AA	Y	N	N	N	N	N	13	f
GG	AA	GG	N	Y	N	N	N	N	6	m
GG	GG	AA	N	N	Y	N	N	N	5	m
GG	GA	AA	N	N	N	N	N	Y	8	f
GA	GA	AA	N	N	Y	N	N	N	1	f
AA	AA	AA	N	Y	N	N	N	N	1	m
GG	GA	AA	N	N	N	N	N	N	6	m
GG	GG	GG	N	Y	N	N	N	N	15	m
GG	AA	AA	Y	N	N	N	Y	Y	2	m
GG	GG	AA	N	N	Y	N	N	N	2	m
GA	GA	AA	N	N	N	N	N	N	2	f
GA	AA	GG	N	N	Y	N	N	N	4	f
GG	GG	AA	N	N	N	N	N	N	9	m
GG	AA	GG	N	Y	N	N	N	N	6	m
GG	GA	AA	N	N	Y	N	Y	N	9	m
GG	GG	AA	N	N	N	N	N	N	11	m
GG	GG	AG	Y	N	N	N	N	N	5	m
GG	AA	GG	N	N	N	N	N	N	9	f
AA	GG	AA	N	N	Y	N	Y	N	3	f
GG	GA	AA	N	N	N	N	N	N	10	f
GG	GA	AA	N	Y	N	N	N	N	5	m
GG	GA	AA	N	N	Y	N	N	N	2	m
GG	AA	AG	N	N	N	N	N	N	12	m
GG	GG	AA	Y	Y	N	N	N	N	n	f
GG	GA	AA	Y	N	Y	N	N	N	2	f
GG	GG	AG	Y	Y	N	N	N	N	4	f
GG	GG	GG	N	Y	N	N	N	N	8	f
GG	AA	AA	N	Y	Y	N	N	N	3.5	f
GG	GA	AA	N	Y	N	N	N	N	13	m
GG	GA	AA	N	Y	N	N	N	N	12	m
GG	GG	GG	N	N	Y	N	Y	Y	5	m
GG	AA	AA	N	Y	N	N	N	N	8	m
GG	GG	AA	N	N	N	N	N	N	13	m
AA	GG	AA	N	Y	N	N	N	N	14	m
GG	GA	AA	N	N	Y	N	N	N	5	m
GG	AA	AG	Y	N	N	N	N	N	5	m
GG	GG	GG	N	N	N	N	Y	N	6	m
GG	GA	AA	N	Y	N	N	N	N	12	m
GG	GA	AA	N	N	Y	N	N	Y	3	m
GG	AA	AA	N	N	N	N	N	N	5	m
GG	GG	AG	N	N	N	N	N	N	2	m
GG	GG	AA	N	Y	N	N	N	N	5	m
GG	GA	GG	N	N	N	N	N	N	3	F
GG	AA	AA	Y	N	Y	N	N	N	14	m
AA	GG	AA	N	Y	N	N	N	N	12	m
GG	GA	AA	N	N	N	N	Y	N	5	m
GG	GA	GG	N	Y	N	N	N	N	10	m
GG	GG	AA	N	N	N	N	N	N	3.5	m
GG	AA	AA	N	Y	N	N	N	N	12	m
GG	GG	AA	N	Y	Y	N	N	N	4	f
GG	GA	AA	N	N	N	N	N	N	13	f
GA	GA	GG	Y	Y	N	N	N	N	4	f
GG	AA	AA	N	N	N	N	N	N	2	f
GG	GG	GG	N	N	Y	N	Y	Y	6	f
GG	GA	AA	N	Y	N	N	N	N	3	f
GG	GA	AA	N	Y	Y	N	N	N	4	f
GA	GG	AA	N	Y	N	N	N	N	3	f
GG	GA	AA	N	N	N	N	N	N	8	f
GG	GA	AA	N	N	N	N	N	N	5	f
GG	GA	AA	N	N	Y	N	N	N	3	f
AA	GA	AA	Y	Y	Y	N	N	N	4	f
GG	AA	AA	N	N	Y	N	N	N	13	f
GG	GG	GG	N	N	N	N	Y	Y	9	f
GG	GA	GG	N	Y	N	N	N	N	7	f
GG	GA	AA	N	N	N	N	N	N	3	f
GG	GG	AG	N	Y	N	N	N	N	7	f
GA	AA	AA	N	N	N	N	N	N	11	m
GA	GG	AA	N	N	Y	N	N	N	7	m
GA	GA	AG	Y	Y	N	N	N	N	9	m
GG	AA	AA	N	N	N	N	N	N	44	m
GG	GG	AA	N	N	Y	N	Y	N	21	m
GG	GA	AG	N	N	N	N	N	N	15	m
GG	AA	GG	N	N	N	N	N	N	13	m
GG	GA	GG	N	N	Y	N	N	N	6	m
GG	GA	AA	N	Y	N	N	N	N	16	m
GG	AA	AA	N	N	Y	N	N	N	7	m
AA	GG	AG	N	N	N	N	N	N	5	m
GG	GA	GG	Y	N	N	N	N	N	9	m
GG	GG	AA	N	Y	N	N	N	N	3	m
GG	AA	AA	N	Y	N	N	N	N	3	m
GG	GG	AG	Y	N	N	N	Y	N	9	m
GG	GA	AA	N	Y	N	N	N	N	7	m
GG	AA	AA	N	Y	N	N	N	N	6	m
GA	GG	AA	N	Y	Y	N	N	N	14	m
GG	GA	AG	N	N	N	N	N	N	11	m
GG	AA	GG	Y	N	Y	N	Y	N	8	m
GG	GG	GG	N	N	N	N	N	N	3	m
GA	GA	AA	N	Y	N	N	N	N	2	m
GA	AA	AA	N	N	Y	N	N	N	2	m
AA	GG	AG	N	Y	N	N	N	N	10	m
GG	GA	AG	N	N	N	N	N	N	5	m
GG	AA	AA	Y	Y	N	N	N	N	8	m
GG	GG	AA	N	N	N	N	Y	N	13	m
GA	GA	AA	N	N	N	N	N	N	4	m
GG	AA	AA	Y	N	N	N	N	N	11	m
GG	GA	AA	N	Y	Y	N	N	N	3	m
GG	GA	AG	N	Y	Y	N	N	N	4	m
GG	AA	AA	N	N	Y	N	N	N	14	m
AA	GG	GG	N	N	N	N	N	N	3	m
GG	GA	AA	N	Y	N	N	N	N	7	m
GG	GG	AA	N	N	N	N	N	N	5	m
GG	GG	AG	Y	N	Y	N	N	N	4	m
GA	GA	AA	N	N	N	N	N	N	10	m
GG	GA	AA	N	Y	N	N	N	N	6	m
GG	GG	AA	Y	N	N	N	N	N	8	m
GG	AA	AG	N	N	Y	N	N	Y	7	m
GG	GG	AG	N	N	N	N	N	N	13	f
GG	GA	AA	N	N	N	N	N	N	2	f
GG	GG	AG	N	Y	N	N	N	N	5	f
GG	AA	AA	N	Y	Y	N	N	N	9	f
GG	GG	AG	Y	N	N	N	N	N	6	f
GA	GA	AA	N	N	N	N	N	N	4.9	f
GG	GG	AG	N	Y	Y	N	N	N	5	f
GG	AA	AA	N	N	N	N	N	N	3	m
GG	GG	GG	N	N	Y	N	Y	N	2	m
AA	GA	AA	N	Y	Y	N	N	N	11	m
GG	GG	AA	N	N	N	N	N	N	10	m
GG	GG	GG	N	N	Y	N	N	N	9	m
GG	GA	AA	Y	Y	N	N	N	N	11	m
GG	GA	AA	N	N	Y	N	N	N	10	m
GG	GA	GG	N	N	N	N	N	N	8	m

## Sheet: CONTROLS
FLT3 TAQ	PAX5	FLT3	POSITIVE FAMILY HISTORY	SMOKING	COUSIN MARRIAGE
GG	AA	AG	N	Y	N
GG	GG	GG	N	Y	Y
GA	GA	AA	N	Y	Y
GA	GG	AA	N	N	N
GG	AA	AG	N	N	N
AA	GG	GG	N	N	N
GG	GA	AA	N	Y	Y
GG	GA	AG	N	N	N
GG	AA	AA	N	N	N
GG	GG	AA	N	Y	N
GG	GA	AG	N	Y	N
GG	GG	GG	N	N	Y
GG	GG	AA	N	N	N
GA	GA	AG	N	Y	N
GG	GG	AA	N	N	N
GG	GG	AA	N	Y	Y
GG	GA	AG	N	N	N
GG	GG	AA	N	Y	N
GG	GA	AA	Y	Y	Y
GG	GG	GG	N	Y	N
GG	GG	AA	N	Y	N
GG	GA	AA	N	N	N
GA	GA	AG	N	N	N
GG	GG	AA	N	Y	N
GG	AA	GG	N	N	N
GG	GG	AA	N	Y	N
GG	GG	AG	N	Y	Y
GG	GA	AA	N	N	N
GG	GG	GG	N	N	N
GA	GG	AG	N	N	N
GG	GG	GG	N	Y	Y
GG	GG	AA	N	Y	N
GG	GA	AG	N	N	N
GG	AA	AG	N	N	Y
GG	GG	AA	N	N	N
GG	GG	GG	N	N	N
GG	GA	AA	N	N	N
GG	GA	AG	N	Y	N
GG	GG	GG	N	N	N
GG	GG	AA	N	N	N
GA	AA	AG	N	Y	N
GG	GA	AA	N	Y	Y
GG	GG	AA	N	N	N
GG	GA	AG	N	N	N
GG	AA	GG	N	N	Y
GG	GG	AA	N	N	N
AA	GG	AG	N	N	N
GG	GG	GG	N	N	N
GG	GA	AA	N	N	N
GG	GG	AG	N	Y	N
GG	AA	AA	N	N	N
GG	GG	AG	N	N	Y
GG	GG	AA	N	Y	N
GG	GG	AA	N	Y	N
GA	GG	AG	N	N	N
GG	GG	AA	N	N	N
GG	GA	AA	N	N	N
GG	AA	AA	N	N	N
GG	GG	AA	N	N	Y
GG	GG	AA	N	N	N
GG	GA	GG	N	Y	N
GG	GA	AA	N	N	N
GG	GG	AA	N	N	Y
GG	AA	AG	N	N	N
GG	GG	AA	N	N	N
GG	GG	AA	N	Y	N
GG	GG	AG	N	N	N
GG	GA	AA	N	N	N
GG	GA	AA	N	Y	N
GG	GG	AA	N	Y	N
GG	GA	AG	N	N	N
GG	GG	AA	N	N	Y
GG	AA	AA	N	N	N
GG	AA	AA	N	N	N
GG	AA	AA	N	N	N
GG	GG	AG	N	N	N
GG	GG	AA	Y	N	N
GG	GA	AA	N	N	Y
GG	GG	AG	N	N	Y
GG	GA	AA	N	N	Y
GA	GG	AA	N	N	N
GG	GG	AA	N	N	N
GG	GA	AG	N	N	N
GG	GG	AA	N	N	N
GG	AA	AA	N	N	N
GG	GG	AA	N	N	N
GG	GA	AG	N	Y	N
GG	GG	AA	N	N	N
GG	GG	GG	N	N	N
GG	AA	AA	N	N	N
GG	GG	AG	N	Y	Y
GA	GA	AA	N	N	N
GG	GA	AA	N	N	N
GG	GA	AA	N	N	N
GG	GG	AG	N	N	N
GG	AA	AA	N	N	N
GG	GG	AA	N	N	Y
GG	GG	AA	N	Y	N
GG	GG	AG	N	N	N
GG	GG	AA	N	N	N
GG	GG	AA	N	Y	N
GG	GA	AG	N	N	N
GG	GG	AA	N	N	Y
GG	GA	AA	N	N	N
GG	GG	AG	N	Y	N
GA	AA	AA	N	N	N
GG	GG	AA	N	N	N
GG	GA	GG	N	Y	Y
GG	GA	AG	N	N	N
GG	GG	AA	N	N	N
GG	GG	AA	N	Y	N
GG	AA	AG	N	N	N
GG	GG	AA	N	N	N
GG	GA	AA	N	N	N
GG	GG	AA	N	N	N
GG	GA	AG	N	N	N
AA	GG	AA	N	N	Y
GG	AA	AG	N	Y	N
GA	AA	AA	N	N	N
GG	GA	AG	N	Y	Y
GG	GG	AA	N	N	N
GG	GG	AG	N	N	N
GG	GA	AA	N	N	N
GG	GG	AG	N	N	N
GG	GA	AA	N	N	Y
GG	GG	AG	N	N	N
GG	GG	AA	N	N	Y
GG	GA	AG	N	N	N
GG	AA	AA	N	Y	N
GG	GG	AG	N	Y	N
GG	GA	AA	N	Y	N
GG	GG	AA	N	Y	Y
GG	AA	AA	N	N	N
GG	AA	AA	N	N	Y
GA	GG	AA	N	N	N
GG	GA	AA	N	N	Y
GG	GG	AA	N	N	N
GG	GG	AA	N	N	N
GG	GG	AA	N	N	N
GG	AA	AA	N	Y	N
GG	GA	AA	N	N	Y
GG	GG	AA	N	N	N
GG	AA	AA	N	N	N
GG	GG	AA	N	N	Y
GG	GG	AA	N	N	N
GG	GA	AA	N	N	N
GG	GG	AA	N	Y	N
GG	AA	AA	N	N	N
GG	GG	AA	N	N	N
GG	GG	AA	N	N	N
GG	GA	AA	N	N	Y
GG	GA	AA	N	N	Y
GG	GA	AA	N	N	N
GG	AA	AA	N	N	N
GG	GA	AA	N	Y	N

## Sheet: Sheet1
m	Y
m	Y
m	Y
m	Y
m	Y
m	Y
m	Y
m	Y
m	Y
m	Y
m	Y
m	Y
m	Y
m	Y
m	Y
m	Y
m	Y
m	Y
m	Y
m	Y
m	Y
m	Y
m	Y
m	N
m	N
m	N
m	N
m	N
m	N
m	N
m	N
m	N
m	N
m	N
m	N
m	N
m	N
m	N
m	N
m	N
m	N
m	N
m	N
m	N
m	N
m	N
m	N
m	N
m	N
m	N
m	N
m	N
m	N
m	N
m	N
m	N
m	N
m	N
m	N
m	N
m	N
m	N
m	N
m	N
m	N
m	N
m	N
m	N
m	N
m	N
m	N
m	N
m	N
m	N
m	N
m	N
m	N
m	N
m	N
m	N
m	N
m	N
m	N
m	N
m	N
m	N
m	N
m	N
m	N
m	N
m	N
m	N
m	N
m	N
m	N
m	N
m	N
m	N
m	N
f	N
f	N
f	N
f	N
f	N
f	N
f	N
f	N
f	N
f	N
f	N
f	N
f	N
f	N
f	N
f	N
f	N
f	N
f	N
f	N
f	N
f	N
f	N
f	N
f	N
F	N
f	N
f	N
f	N
f	N
f	N
f	N
f	N
f	N
f	N
f	N
f	N
f	N
f	N
f	N
f	N
f	N
f	N
f	N
f	N
f	N
f	Y
f	Y
f	Y
f	Y
f	Y
f	Y
f	Y
f	Y
f	Y
f	Y
Gender	COUSIN MARRIAGE
